# Supplementary material
Source: PubMed Central journal article supplement (PMC3805323)

# ratio correlations 117/114 against 116/114

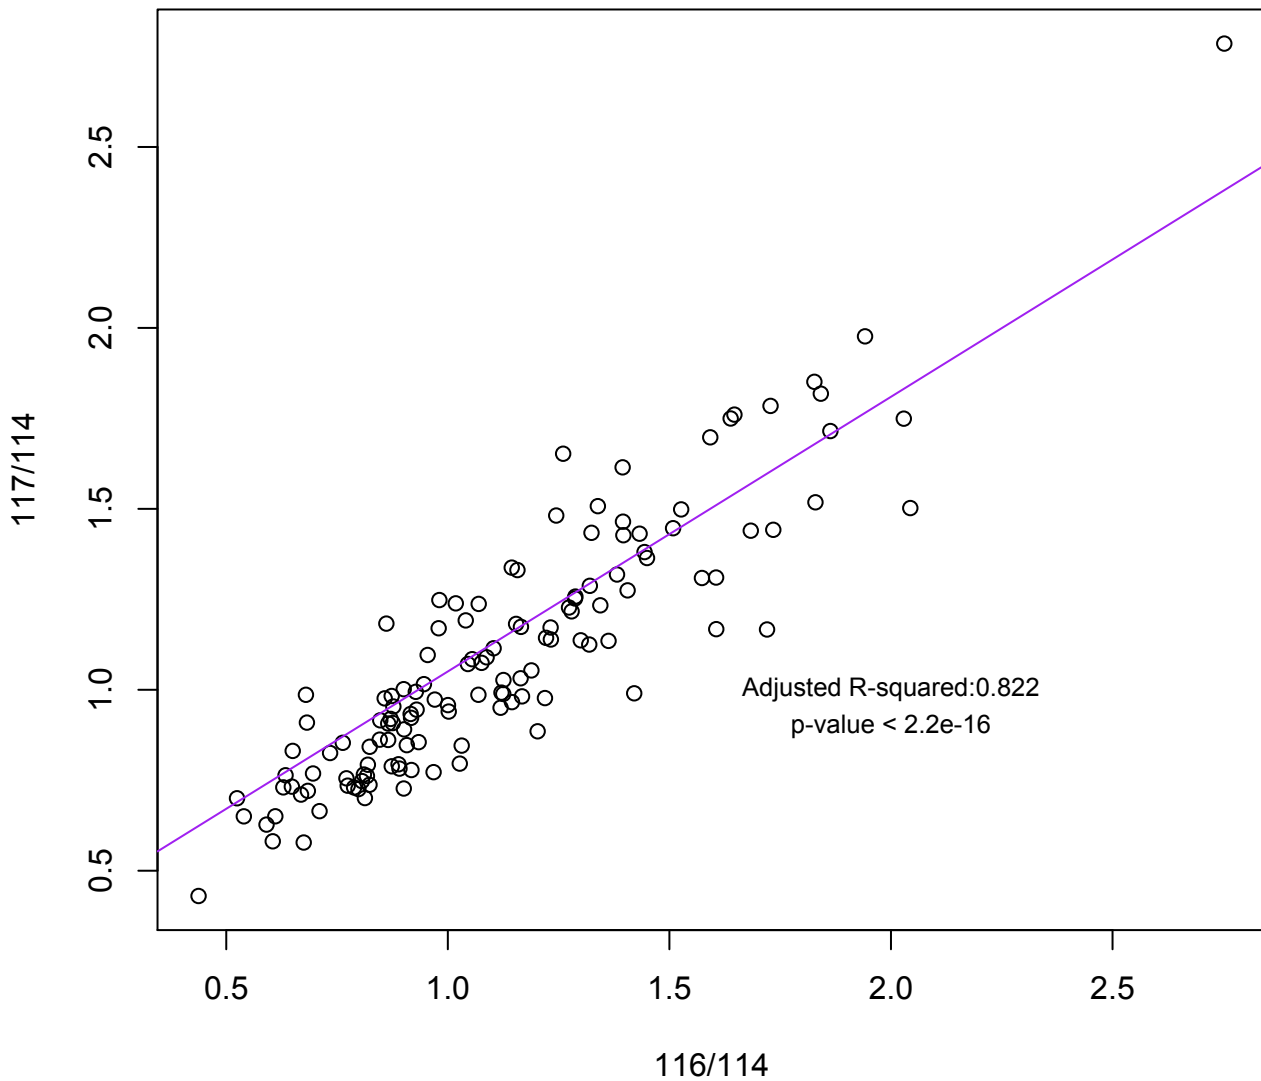

Supplement: pr301127f_si_001.pdf [file pr301127f_si_001.pdf]
